# Supplementary material for: Crystal structures and magnetic properties of chiral heterobimetallic chains based on the dicyanoruthenate building block
Source: Royal Society of Chemistry journal article supplement (doi:10.1039/c4dt02518k), 2014-01-01
Supplement: c4dt02518k1.pdf [file c4dt02518k1.pdf]

## Electronic Supporting Information

### **Crystal structures and magnetic properties of chiral heterobimetallic chains based on the dicyanoruthenate building block**

Jing Ru,<sup>a</sup> Feng Gao,<sup>a</sup> Min-Xia Yao,<sup>b</sup> Tao Wu,<sup>a</sup> and Jing-Lin Zuo<sup>\*a</sup>

<sup>a</sup> *State Key Laboratory of Coordination Chemistry, School of Chemistry and Chemical Engineering, Nanjing National Laboratory of Microstructures, Nanjing University, Nanjing 210093, P. R. China*

<sup>b</sup> *School of Science, Nanjing University of Technology, Nanjing 210009, P. R. China*

---

\* To whom correspondence should be addressed. Email: zuojl@nju.edu.cn; Fax: +86-25-83314502.  
Nanjing University.

## Caption of Content

- 1. Table S1.** Selected bond lengths ( $\text{\AA}$ ) and angles ( $^\circ$ ) for complex **1**-(*SS*)
- 2. Table S2.** Selected bond lengths ( $\text{\AA}$ ) and angles ( $^\circ$ ) for complex **2**-(*SS*)
- 3. Figure S1.** CD spectra of **1**-(*RR*), **1**-(*SS*), (*R,R*)-H<sub>2</sub>Salcy and (*S,S*)- H<sub>2</sub>Salcy in KBr pellets
- 4. Figure S2.** CD spectra of **2**-(*RR*), **2**-(*SS*), (*R,R*)-H<sub>2</sub>Salphen and (*S,S*)- H<sub>2</sub>Salphen in KBr pellets
- 5. Figure S3.** Perspective drawing of the crystallographically structural of unit of **1**-(*SS*) showing the atom numbering. Hydrogen atoms are omitted for clarity.
- 6. Figure S4.** Perspective drawing of the crystallographically structural of unit of **2**-(*SS*) showing the atom numbering. Hydrogen atoms are omitted for clarity.
- 7. Figure S5.** Packing diagram of **1**-(*RR*) showing stacking interactions between the aromatic rings of the salcy ligand
- 8. Figure S6.** Plot of  $1/\chi_M$  vs  $T$  for **1**-(*RR*). The red solid line is the fitting result by Curie-Weiss Law.
- 9. Figure S7.** Plot of  $1/\chi_M$  vs  $T$  for **2**-(*RR*). The red solid line is the fitting result by Curie-Weiss Law.
- 10. Figure S8.** Top: Frequency dependence of the in-of-phase ac susceptibility ( $\chi'$ ) of **2**-(*RR*) from 1.9 to 10 K at 0 Oe dc field. Bottom: Frequency dependence of the out-of-phase ac susceptibility ( $\chi''$ ) of **2**-(*RR*) from 1.9 to 10 K at a 0 Oe dc field.

**Table S1** Selected bond lengths (Å) and angles (°) for complex **1**-(SS)

|                  |            |                    |            |
|------------------|------------|--------------------|------------|
| Ru(1)-N(1)       | 1.972(4)   | Ru(1)-N(2)         | 1.990(3)   |
| Ru(1)-O(2)       | 2.028(3)   | Ru(1)-O(1)         | 2.040(3)   |
| Ru(1)-C(17)      | 2.085(4)   | Ru(1)-C(38)#1      | 2.077(4)   |
| Mn(1)-O(3)       | 1.847(3)   | Mn(1)-O(4)         | 1.875(4)   |
| Mn(1)-N(5)       | 1.978(4)   | Mn(1)-N(4)         | 1.989(4)   |
| Mn(1)-N(3)       | 2.333(4)   | Mn(1)-N(6)         | 2.346(4)   |
| N(1)-Ru(1)-N(2)  | 83.10(15)  | N(1)-Ru(1)-O(2)    | 90.16(14)  |
| N(2)-Ru(1)-O(2)  | 171.09(15) | N(1)-Ru(1)-O(1)    | 173.18(14) |
| C(17)-N(3)-Mn(1) | 157.9(4)   | C(38)-N(6)-Mn(1)   | 155.6(3)   |
| C(31)-N(4)-Mn(1) | 124.8(4)   | C(30)-N(4)-Mn(1)   | 112.3(3)   |
| N(3)-C(17)-Ru(1) | 171.4(4)   | N(6)-C(38)-Ru(1)#2 | 175.5(5)   |
| C(24)-N(5)-Mn(1) | 123.0(4)   | C(25)-N(5)-Mn(1)   | 113.2(3)   |
| C(16)-O(1)-Ru(1) | 124.6(3)   | C(1)-O(2)-Ru(1)    | 122.8(3)   |
| C(18)-O(3)-Mn(1) | 125.5(3)   | C(37)-O(4)-Mn(1)   | 128.0(3)   |

Symmetry transformations used to generate equivalent atoms: #1  $x+1, y, z$ ; #2  $x-1, y, z$

**Table S2** Selected bond lengths (Å) and angles (°) for complex **2**-(SS)

|                    |          |                    |          |
|--------------------|----------|--------------------|----------|
| C(90)-Ru(1)        | 2.034(7) | C(91)-Ru(1)        | 2.173(7) |
| Mn(1)-O(1)         | 2.032(5) | Mn(1)-N(1)         | 2.047(6) |
| Mn(1)-N(2)         | 2.049(6) | Mn(1)-O(2)         | 2.063(5) |
| Mn(1)-N(9)         | 2.297(7) | Mn(1)-N(10)        | 2.301(6) |
| Mn(3)-N(23)        | 2.352(6) | Mn(3)-N(24)        | 2.380(6) |
| Mn(3)-N(18)        | 2.029(6) | Mn(3)-N(17)        | 2.037(5) |
| N(3)-Ru(1)         | 2.072(6) | N(4)-Ru(1)         | 2.037(5) |
| N(7)-Ru(2)         | 2.023(6) | N(8)-Ru(2)         | 2.299(6) |
| O(7)-Ru(2)         | 2.055(5) | O(8)-Ru(2)         | 2.018(4) |
| O(3)-Ru(1)         | 2.068(4) | O(4)-Ru(1)         | 2.056(4) |
| N(9)-C(89)-Ru(2)#1 | 167.3(7) | N(10)-C(90)-Ru(1)  | 174.5(6) |
| N(11)-C(91)-Ru(1)  | 172.4(6) | N(12)-C(92)-Ru(2)  | 178.9(6) |
| N(1)-Mn(1)-N(10)   | 87.9(2)  | N(2)-Mn(1)-N(10)   | 85.4(2)  |
| O(2)-Mn(1)-N(10)   | 93.1(2)  | N(9)-Mn(1)-N(10)   | 173.9(2) |
| C(7)-N(1)-Mn(1)    | 124.1(4) | C(8)-N(1)-Mn(1)    | 102.5(4) |
| C(10)-N(2)-Mn(1)   | 118.4(5) | C(9)-N(2)-Mn(1)    | 106.9(4) |
| C(183)-N(23)-Mn(3) | 159.5(6) | C(184)-N(24)-Mn(3) | 176.1(6) |
| C(38)-N(4)-Ru(1)   | 128.6(5) | C(37)-N(4)-Ru(1)   | 113.0(4) |

Symmetry transformations used to generate equivalent atoms: #1  $x, y, z-1$ ; #2  $x, y, z+1$

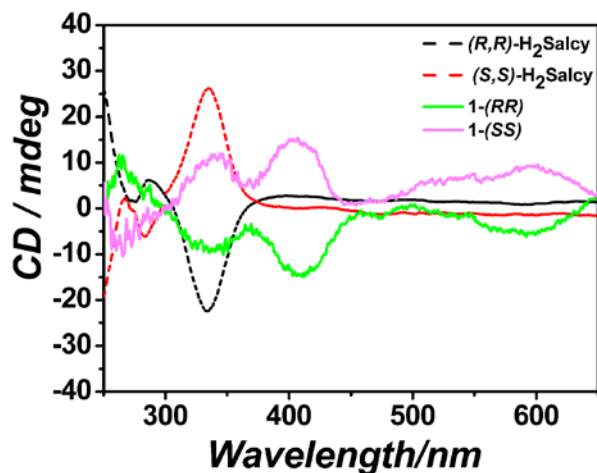

**Figure S1.** CD spectra of 1-(*RR*), 1-(*SS*), (*R,R*)-H<sub>2</sub>Salcy and (*S,S*)- H<sub>2</sub>Salcy in KBr pellets.

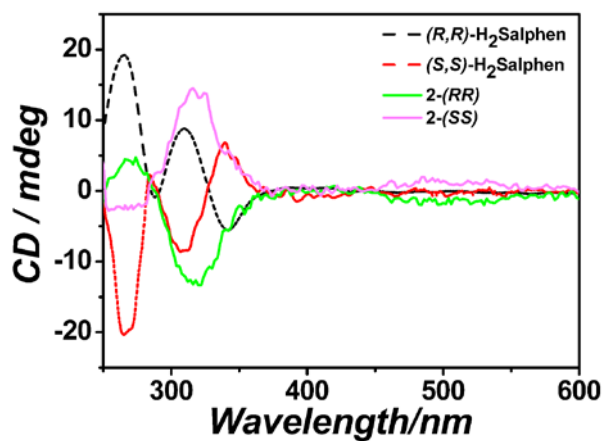

**Figure S2.** CD spectra of 2-(*RR*), 2-(*SS*), (*R,R*)-H<sub>2</sub>Salphen and (*S,S*)- H<sub>2</sub>Salphen in KBr pellets.

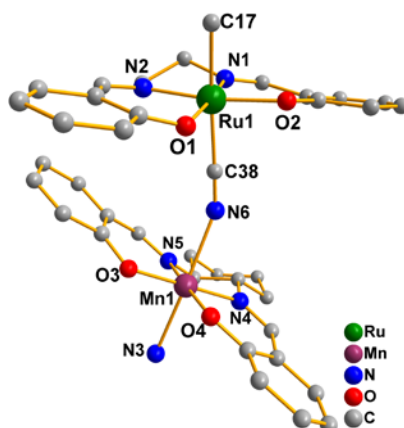

**Figure S3.** Perspective drawing of the crystallographically structural unit of 1-(*SS*) showing the atom numbering. Hydrogen atoms are omitted for clarity.

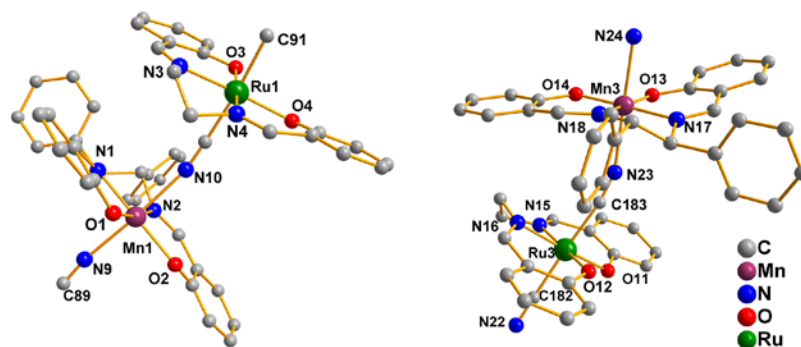

**Figure S4.** Perspective drawing of the crystallographically structural unit of **2-(SS)** showing the atom numbering. Hydrogen atoms are omitted for clarity.

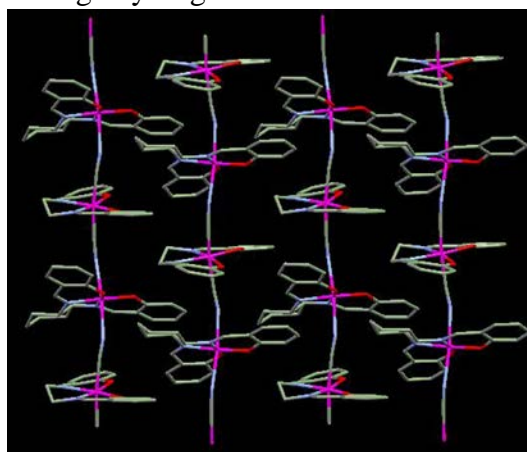

**Figure S5.** Packing diagram of **1-(RR)** showing stacking interactions between the aromatic rings of the salicy ligand.

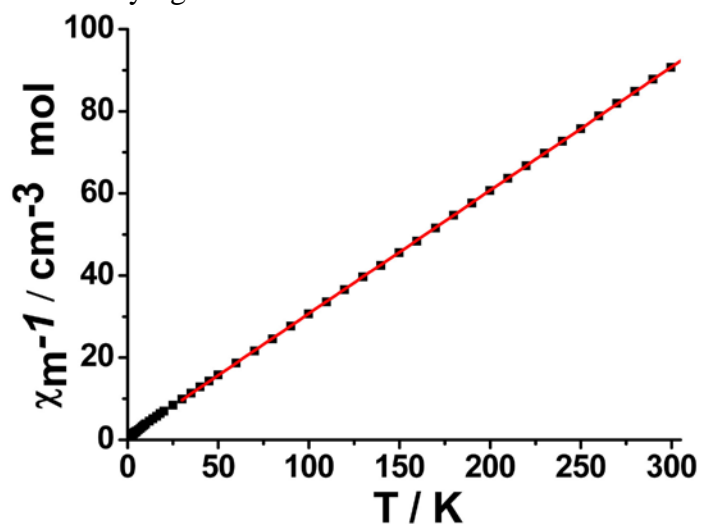

**Figure S6.** Plot of  $1/\chi_M$  vs  $T$  for **1-(RR)**. The red solid line is the fitting result by Curie-Weiss Law.

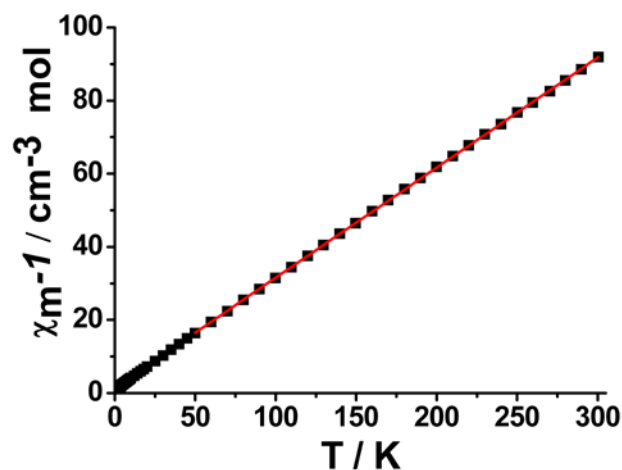

**Figure S7.** Plot of  $1/\chi_M$  vs  $T$  for **2-(RR)**. The red solid line is the fitting result by Curie-Weiss Law.

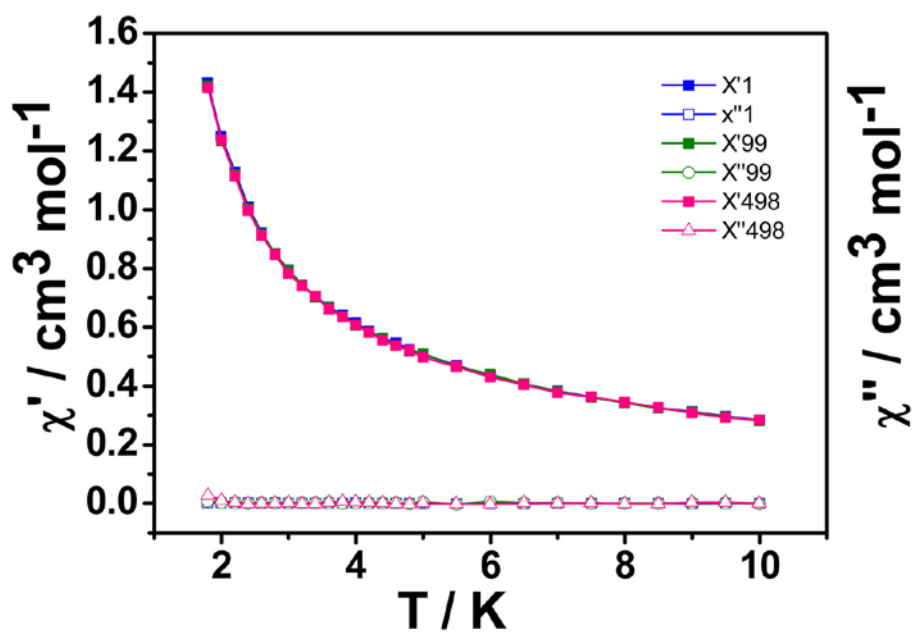

**Figure S8.** Top: Frequency dependence of the in-of-phase ac susceptibility ( $\chi'$ ) of **2-(RR)** from 1.9 to 10 K at 0 Oe dc field. Bottom: Frequency dependence of the out-of-phase ac susceptibility ( $\chi''$ ) of **2-(RR)** from 1.9 to 10 K at a 0 Oe dc field.
